# Supplementary material for: Unveiling causal relationship between non-covalent interactions and evaluated Young’s modulus within oligolignols-cellulose complexes
Source: PeerJ journal article supplement (doi:10.7717/peerj-pchem.33), 2024-09-20
Supplement: Supplemental_Raw_Data_S2.xlsx [file Supplemental_Raw_Data_S2.xlsx]

## Sheet: Complex1, CAβO4SAβ5CA-Cell mini
Lignol (adh)	Cellulose (cell)	d(A..H) (Å)	d(A..D) (Å)	α(D..H..A)	ρ(rc) (a.u.)	Label	type?	weak? ρ(rc) <= 0.005
OH	O	1.76	2.74	171	0.04	a	I
OH	O	1.78	2.71	155.7	0.038	b	I
OH	O	2.1	3.06	175.3	0.019	c	I
O	HC	2.21	3.19	150.1	0.018	d	IV
O	HO	2.18	2.96	136.8	0.016	e	II
CH	O	2.3	3.15	133.7	0.015	f	III
CH	O	2.3	3.25	144.6	0.015	g	III
O	HC	2.63	3.69	164.6	0.008	h	IV
O	HC	2.71	3.4	121.4	0.007	i	IV
CH	O	2.73	3.72	152	0.006	j	III
O	HC	2.75	3.42	119.3	0.006	k	IV
OH	O	3.06	3.93	149.5	0.002	l	I	weak
CH	O	3.35	3.93	114.4	0.002	m	III	weak
type of interaction		sum of electronic density ρ(rc)	number of interactions	average		type of interaction		sum of electronic density ρ(rc)	number of interactions	average
OH...O	I	0.099	4	0.02475		XH…O		0.137	8	0.017125
O…HO	II	0.016	1	0.016
CH…O	III	0.038	4	0.0095
O…HC	IV	0.039	4	0.00975
Cπ…HC		0	0	#DIV/0!
CπH…O		0	0	#DIV/0!
CπH/Cπ…O/HC	V	0	0	#DIV/0!
C…HC	VI	0	0	#DIV/0!
	* trivial name
type of interaction		sum of electronic density ρ(rc)	number of interactions	average
weak		0.004	2	0.002
no weak		0.188	11	0.0170909

## Sheet: Complex1, CAβO4SAβ5CA-Cell f2
Lignol (adh)	Cellulose (cell)	d(A..H) (Å)	d(A..D) (Å)	α(D..H..A)	ρ(rc) (a.u.)	Label	type?	weak? ρ(rc) <= 0.005
OH	O				0.0276	a	I
O	HC				0.0112	b	IV
O	HC				0.0108	c	IV
Cπ	HC				0.0094	d	V
O	HC				0.0087	e	IV
CH	O				0.0071	f	III
O	HC				0.007	g	IV
CπH	O				0.0068	h	V
CH	O				0.0062	i	III
O	HC				0.0057	j	IV
CH	O				0.0053	k	III
CπH	O				0.0036	l	V	weak
O	HC				0.0035	m	IV	weak
O	HC				0.0033	n	IV	weak
CH	O				0.0032	o	III	weak
O	HC				0.0031	p	IV	weak
Cπ	HC				0.0023	q	V	weak
C	HC				0.0023	r	VI	weak
CH	O				0.0023	s	III	weak
Cπ	HC				0.0023	t	V	weak
O	HC				0.0022	u	IV	weak
O	HC				0.0018	v	IV	weak
Cπ	HC				0.0011	w	V	weak
CH	O				0.001	x	III	weak
type of interaction		sum of electronic density ρ(rc)	number of interactions	average		type of interaction		sum of electronic density ρ(rc)	number of interactions	average
OH...O	I	0.0276	1	0.0276		XH…O		0.0631	9	0.00701111
O…HO	II	0	0	#DIV/0!
CH…O	III	0.0251	6	0.00418333
O…HC	IV	0.0573	10	0.00573
Cπ…HC		0.0151	4	0.003775
CπH…O		0.0104	2	0.0052
CπH/Cπ…O/HC	V	0.0255	6	0.00425
C…HC	VI	0.0023	1	0.0023
	* trivial name
type of interaction		sum of electronic density ρ(rc)	number of interactions	average
weak		0.032	13	0.00246154
no weak		0.1058	11	0.00961818

## Sheet: Complex1, CAβO4SAβ5CA-Cell f3
Lignol (adh)	Cellulose (cell)	d(A..H) (Å)	d(A..D) (Å)	α(D..H..A)	ρ(rc) (a.u.)	Label	type?	weak? ρ(rc) <= 0.005
OH	O				0.0392	a	I
O	HC				0.0113	b	IV
Cπ	HC				0.0101	c	V
O	HC				0.0099	d	IV
Cπ	HC				0.0083	e	V
C	HC				0.0065	f	VI
O	HC				0.0065	g	IV
O	HC				0.0065	h	IV
OH	O				0.0062	i	I
CH	O				0.0051	j	III
O	HC				0.0051	k	IV
OH	O				0.0047	l	I	weak
CH	O				0.0032	m	III	weak
Cπ	HC				0.0024	n	V	weak
O	HC				0.0023	o	IV	weak
C	HC				0.0023	p	VI	weak
CH	O				0.0022	q	III	weak
Cπ	HC				0.0021	r	V	weak
C	HC				0.0016	s	VI	weak
CπH	O				0.0016	t	V	weak
CH	O				0.0013	u	III	weak
CH	O				0.0012	v	III	weak
type of interaction		sum of electronic density ρ(rc)	number of interactions	average		type of interaction		sum of electronic density ρ(rc)	number of interactions	average
OH...O	I	0.0501	3	0.0167		XH…O		0.0647	9	0.00718889
O…HO	II	0	0	#DIV/0!
CH…O	III	0.013	5	0.0026
O…HC	IV	0.0416	6	0.00693333
Cπ…HC		0.0229	4	0.005725
CπH…O		0.0016	1	0.0016
CπH/Cπ…O/HC	V	0.0245	5	0.0049
C…HC	VI	0.0104	3	0.00346667
	* trivial name
type of interaction		sum of electronic density ρ(rc)	number of interactions	average
weak		0.0249	11	0.00226364
no weak		0.1147	11	0.0104273

## Sheet: Complex1, CAβO4SAβ5CA-Cell f4
Lignol (adh)	Cellulose (cell)	d(A..H) (Å)	d(A..D) (Å)	α(D..H..A)	ρ(rc) (a.u.)	Label	type?	weak? ρ(rc) <= 0.005
OH	O				0.0347	a	I
OH	O				0.0267	b	I
O	HO				0.0249	c	II
OH	O				0.0167	d	I
O	HC				0.0134	e	IV
O	HC				0.01	f	IV
O	HO				0.0093	g	II
O	HC				0.0092	h	IV
CH	O				0.008	i	III
Cπ	HC				0.0071	j	V
O	HC				0.0067	k	IV
Cπ	HC				0.006	l	V
CH	O				0.0056	m	III
CH	O				0.0043	n	III	weak
Cπ	HC				0.0037	o	V	weak
CH	O				0.0013	p	III	weak
CπH	O				0.0004	q	V	weak
type of interaction		sum of electronic density ρ(rc)	number of interactions	average		type of interaction		sum of electronic density ρ(rc)	number of interactions	average
OH...O	I	0.0781	3	0.0260333		XH…O		0.0977	8	0.0122125
O…HO	II	0.0342	2	0.0171
CH…O	III	0.0192	4	0.0048
O…HC	IV	0.0393	4	0.009825
Cπ…HC		0.0168	3	0.0056
CπH…O		0.0004	1	0.0004
CπH/Cπ…O/HC	V	0.0172	4	0.0043
C…HC	VI	0	0	#DIV/0!
	* trivial name
type of interaction		sum of electronic density ρ(rc)	number of interactions	average
weak		0.0097	4	0.002425
no weak		0.1783	13	0.0137154
			REVISAR, cambió de 20 a 13

## Sheet: Complex1, CAβO4SAβ5CA-Cell f5
Lignol (adh)	Cellulose (cell)	d(A..H) (Å)	d(A..D) (Å)	α(D..H..A)	ρ(rc) (a.u.)	Label	type?	weak? ρ(rc) <= 0.005
O	HO				0.0419	a	II
OH	O				0.0373	b	I
O	HC				0.0077	c	IV
O	HC				0.0074	d	IV
CH	O				0.0074	e	III
C	HC				0.0072	f	VI
CH	O				0.0072	g	III
O	HC				0.0071	h	IV
O	HC				0.0059	i	IV
O	HC				0.0058	j	IV
O	HC				0.0053	k	IV
Cπ	HC				0.0045	l	V	weak
CH	O				0.0039	m	III	weak
Cπ	HC				0.0031	n	V	weak
CH	O				0.003	o	III	weak
CH	O				0.0026	p	III	weak
Cπ	HC				0.0026	q	V	weak
O	HC				0.0026	r	IV	weak
Cπ	HC				0.0015	s	V	weak
type of interaction		sum of electronic density ρ(rc)	number of interactions	average		type of interaction		sum of electronic density ρ(rc)	number of interactions	average
OH...O	I	0.0373	1	0.0373		XH…O		0.0614	6	0.0102333
O…HO	II	0.0419	1	0.0419
CH…O	III	0.0241	5	0.00482
O…HC	IV	0.0418	7	0.00597143
Cπ…HC		0.0117	4	0.002925
CπH…O		0	0	#DIV/0!
CπH/Cπ…O/HC	V	0.0117	4	0.002925
C…HC	VI	0.0072	1	0.0072
	* trivial name
type of interaction		sum of electronic density ρ(rc)	number of interactions	average
weak		0.0238	8	0.002975
no weak		0.1402	11	0.0127455

## Sheet: Complex1, CAβO4SAβ5CA-Cell f6
Lignol (adh)	Cellulose (cell)	d(A..H) (Å)	d(A..D) (Å)	α(D..H..A)	ρ(rc) (a.u.)	Label	type?	weak? ρ(rc) <= 0.005
O	HO				0.0191	a	II
OH	O				0.0123	b	I
CH	O				0.0118	c	III
O	HC				0.0103	d	IV
CH	O				0.0101	e	III
CH	O				0.01	f	III
O	HC				0.0073	g	IV
CH	O				0.0068	h	III
O	HC				0.0065	i	IV
CH	O				0.0061	j	III
O	HC				0.006	k	IV
O	HC				0.0058	l	IV
O	HC				0.0058	m	IV
Cπ	HC				0.0053	n	V
O	HC				0.0051	o	IV
Cπ	HC				0.005	p	V	weak
Cπ	HC				0.0046	q	V	weak
CH	O				0.0046	r	III	weak
O	HC				0.0036	s	IV	weak
O	HC				0.003	t	IV	weak
Cπ	HC				0.0019	u	V	weak
CH	O				0.0018	v	III	weak
type of interaction		sum of electronic density ρ(rc)	number of interactions	average		type of interaction		sum of electronic density ρ(rc)	number of interactions	average
OH...O	I	0.0123	1	0.0123		XH…O		0.0635	8	0.0079375
O…HO	II	0.0191	1	0.0191
CH…O	III	0.0512	7	0.00731429
O…HC	IV	0.0534	9	0.00593333
Cπ…HC		0.0168	4	0.0042
CπH…O		0	0	#DIV/0!
CπH/Cπ…O/HC	V	0.0168	4	0.0042
C…HC	VI	0	0	#DIV/0!
	* trivial name
type of interaction		sum of electronic density ρ(rc)	number of interactions	average
weak		0.0245	7	0.0035
no weak		0.1283	15	0.00855333

## Sheet: Complex1, CAβO4SAβ5CA-Cell f7
Lignol (adh)	Cellulose (cell)	d(A..H) (Å)	d(A..D) (Å)	α(D..H..A)	ρ(rc) (a.u.)	Label	type?	weak? ρ(rc) <= 0.005
OH	O				0.0417	a	I
O	HC				0.0113	b	IV
O	HO				0.0109	c	II
CH	O				0.0108	d	III
Cπ	HC				0.0097	e	V
CH	O				0.0097	f	III
O	HC				0.0088	g	IV
O	HC				0.0084	h	IV
O	HC				0.0084	i	IV
O	HC				0.0083	j	IV
O	HC				0.0081	k	IV
O	HC				0.0073	l	IV
CH	O				0.0066	m	III
O	HC				0.0065	n	IV
O	HC				0.0064	o	IV
Cπ	HC				0.006	p	V
O	HC				0.006	q	IV
CH	O				0.0053	r	III
CH	O				0.0053	s	III
CH	O				0.0051	t	III
O	HC				0.0039	u	IV	weak
O	HC				0.0036	v	IV	weak
CH	O				0.0031	w	III	weak
Cπ	HC				0.0029	x	V	weak
Cπ	HC				0.0028	y	V	weak
O	HC				0.0026	z	IV	weak
Cπ	HC				0.0015	aa	V	weak
type of interaction		sum of electronic density ρ(rc)	number of interactions	average		type of interaction		sum of electronic density ρ(rc)	number of interactions	average
OH...O	I	0.0417	1	0.0417		XH…O		0.0876	8	0.01095
O…HO	II	0.0109	1	0.0109
CH…O	III	0.0459	7	0.00655714
O…HC	IV	0.0896	13	0.00689231
Cπ…HC		0.0229	5	0.00458
CπH…O		0	0	#DIV/0!
CπH/Cπ…O/HC	V	0.0229	5	0.00458
C…HC	VI	0	0	#DIV/0!
	* trivial name
type of interaction		sum of electronic density ρ(rc)	number of interactions	average
weak		0.0204	7	0.00291429
no weak		0.1906	20	0.00953

## Sheet: Complex1, CAβO4SAβ5CA-Cell f8
Lignol (adh)	Cellulose (cell)	d(A..H) (Å)	d(A..D) (Å)	α(D..H..A)	ρ(rc) (a.u.)	Label	type?	weak? ρ(rc) <= 0.005
OH	O				0.0238	a	I
O	HO				0.0173	b	II
CH	O				0.0092	c	III
CH	O				0.0085	d	III
CH	O				0.0075	e	III
O	HC				0.0074	f	IV
O	HC				0.0068	g	IV
CH	O				0.0068	h	III
O	HC				0.0058	i	IV
CH	O				0.0049	j	III	weak
Cπ	HC				0.0048	k	V	weak
O	HC				0.0043	l	IV	weak
O	HC				0.0042	m	IV	weak
O	HC				0.0041	n	IV	weak
O	HC				0.0036	o	IV	weak
Cπ	HC				0.0029	p	V	weak
CH	O				0.0026	q	III	weak
O	HC				0.0024	r	IV	weak
O	HC				0.0024	s	IV	weak
Cπ	HC				0.0006	t	V	weak
type of interaction		sum of electronic density ρ(rc)	number of interactions	average		type of interaction		sum of electronic density ρ(rc)	number of interactions	average
OH...O	I	0.0238	1	0.0238		XH…O		0.0633	7	0.00904286
O…HO	II	0.0173	1	0.0173
CH…O	III	0.0395	6	0.00658333
O…HC	IV	0.041	9	0.00455556
Cπ…HC		0.0083	3	0.00276667
CπH…O		0	0	#DIV/0!
CπH/Cπ…O/HC	V	0.0083	3	0.00276667
C…HC	VI	0	0	#DIV/0!
	* trivial name
type of interaction		sum of electronic density ρ(rc)	number of interactions	average
weak		0.0368	11	0.00334545
no weak		0.0931	9	0.0103444

## Sheet: Complex2, CAβO4SAββSA-Cell mini
Lignol (adh)	Cellulose (cell)	d(A..H) (Å)	d(A..D) (Å)	α(D..H..A)	ρ(rc) (a.u.)	Label	type?	weak? ρ(rc) <= 0.005
OH	O	1.81	2.64	141.6	0.036	a	I
O	HO	1.99	2.77	136.4	0.025	b	II
CH	O	2.29	3.23	142.7	0.014	c	III
O	HO	2.25	2.92	125.9	0.013	d	II
O	HC	2.45	3.35	139.1	0.011	e	IV
O	HC	2.45	3.47	155.7	0.01	f	IV
O	HC	2.49	3.43	144.6	0.009	g	IV
O	HC	2.59	3.55	147	0.008	h	IV
O	HC	2.58	3.41	144.1	0.006	i	IV
CH	O	2.83	3.38	110.6	0.005	j	III	weak
O	HC	2.89	3.73	134.2	0.004	k	IV	weak
O	HC	2.91	3.78	137.9	0.004	l	IV	weak
CH	O	2.99	3.85	135.4	0.003	m	III	weak
CH	O	3	3.86	136	0.003	n	III	weak
CH	O	3.05	3.63	113.3	0.003	o	III	weak
CH	O	3.13	3.9	127.9	0.003	p	III	weak
CπH	O	3.16	4.02	137.4	0.002	q	V	weak
O	HC	3.36	4.16	131.7	0.001	r	IV	weak
O	HC	3.44	4.03	115.8	0.001	s	IV	weak
type of interaction		sum of electronic density ρ(rc)	number of interactions	average		type of interaction		sum of electronic density ρ(rc)	number of interactions	average
OH...O	I	0.036	1	0.036		XH…O		0.069	8	0.008625
O…HO	II	0.038	2	0.019
CH…O	III	0.031	6	0.00516667
O…HC	IV	0.054	9	0.006
Cπ…HC		0	0	#DIV/0!
CπH…O		0.002	1	0.002
CπH/Cπ…O/HC	V	0.002	1	0.002
C…HC	VI	0	0	#DIV/0!
	* trivial name
type of interaction		sum of electronic density ρ(rc)	number of interactions	average
weak		0.029	10	0.0029
no weak		0.132	9	0.0146667

## Sheet: Complex2, CAβO4SAββSA-Cell f2
Lignol (adh)	Cellulose (cell)	d(A..H) (Å)	d(A..D) (Å)	α(D..H..A)	ρ(rc) (a.u.)	Label	type?	weak? ρ(rc) <= 0.005
O	HO				0.0284	a	II
O	HC				0.0106	b	IV
Cπ	HC				0.0096	c	V
CH	O				0.0088	d	III
CH	O				0.0074	e	III
CH	O				0.0066	f	III
O	HC				0.0063	g	IV
O	HC				0.0062	h	IV
O	HC				0.0062	i	IV
Cπ	HC				0.006	j	V
CH	O				0.0059	k	III
O	HC				0.0058	l	IV
O	HC				0.0055	m	IV
Cπ	HC				0.0053	n	V
O	HC				0.0048	o	IV	weak
O	HC				0.0043	p	IV	weak
CH	O				0.0042	q	III	weak
CH	O				0.0042	r	III	weak
CH	O				0.0035	s	III	weak
CH	O				0.0032	t	III	weak
O	HC				0.0029	u	IV	weak
CH	O				0.0022	v	III	weak
Cπ	HC				0.0022	w	V	weak
CH	O				0.002	x	III	weak
O	HC				0.0015	y	IV	weak
CH	O				0.0013	z	III	weak
CH	O				0.0006	aa	III	weak
O	HC				0.0005	ab	IV	weak
type of interaction		sum of electronic density ρ(rc)	number of interactions	average		type of interaction		sum of electronic density ρ(rc)	number of interactions	average
OH...O	I	0	0	#DIV/0!		XH…O		0.0499	12	0.00415833
O…HO	II	0.0284	1	0.0284
CH…O	III	0.0499	12	0.00415833
O…HC	IV	0.0546	11	0.00496364
Cπ…HC		0.0231	4	0.005775
CπH…O		0	0	#DIV/0!
CπH/Cπ…O/HC	V	0.0231	4	0.005775
C…HC	VI	0	0	#DIV/0!
	* trivial name
type of interaction		sum of electronic density ρ(rc)	number of interactions	average
weak		0.0374	14	0.00267143
no weak		0.1186	14	0.00847143

[truncated: 24 more sheets: Complex2, CAβO4SAββSA-Cell f3, Complex2, CAβO4SAββSA-Cell f4, Complex2, CAβO4SAββSA-Cell f5, Complex2, CAβO4SAββSA-Cell f6, Complex2, CAβO4SAββSA-Cell f7, Complex2, CAβO4SAββSA-Cell f8, Complex3, SAβO4SAββSA-Cell mini, Complex3, SAβO4SAββSA-Cell f2, Complex3, SAβO4SAββSA-Cell f3, Complex3, SAβO4SAββSA-Cell f4, Complex3, SAβO4SAββSA-Cell f5, Complex3, SAβO4SAββSA-Cell f6, Complex3, SAβO4SAββSA-Cell f7, Complex3, SAβO4SAββSA-Cell f8, Complex4, CAββCA-Cell mini, Complex4, CAββCA-Cell f2, Complex4, CAββCA-Cell f3, Complex4, CAββCA-Cell f4, Complex4, CAββCA-Cell f5, Complex4, CAββCA-Cell f6 …]
